# Supplementary material
Source: HighWire-hosted journal article supplement (doi:10.1101/rna.079674.123)
Supplement: Supplemental_Figure_Legends.docx [file Supplemental_Figure_Legends.docx]

**Figure S1.** Mature and pre-tRNA mapping read coverage of tRNA-Tyr-GUA-1 and tRNA-Asp-GUC-1. A. Read coverage of the mature tRNA mapping reads for tRNA-Asp-GUC -1 (top) and tRNA-Tyr-GUA-1 (bottom) from 5’ (left) to 3’ (right). B. Read coverage of the pre-tRNA mapping reads for tRNA-Asp-GUC-1-1 (top), tRNA- Asp-GUC-1-2 (middle), and tRNA-Tyr-GUA-1 (bottom) from 5’ (left) to 3’ (right). C. Read coverage of mature for tRNA-Asn-GUU-1-1 (top) and pre-tRNA mapping reads to tRNA- Asn-GUU-1-2 (middle and bottom).

**Figure S2.** RT-PCR confirmations for XRN RNAi depletions.

**Figure S3.** A. Triplicate growth curve of *T. brucei* cells subjected to both RNAi knockdown and Actinomycin D treatments, where total RNA was collected at every time point.

**Figure S4.** RNAi Knockdown of XRNE does not stabilize tRNATyr conformers. A and B. Northern blot hybridization performed on the extracted total RNA samples from XRNE RNAi strain *T. brucei* cells subjected to Actinomycin D treatment with and without XRNE depletion. The tRNAGlu was used as loading control. C to F. Linear regression calculations utilizing the amounts of mature and alternate conformer tRNATyr with and without XRNE depletion. Data were fit to a one-phase decay with R2 values as indicated. All data plotted were the result of 3 biological replicas.

**Figure S5**. The tRNATyr alternate conformer is not circular. A. Two-dimensional gel Northern blot hybridization performed on *T. brucei* 29-13 WT extracted total RNA samples revealing the mature and alternate conformers of tRNATyr. B. Northern blot hybridization revealing tRNAGlu on the same gel.
